# Supplementary material for: Extremely hypomorphic and severe deep intronic variants in the ABCA4 locus result in varying Stargardt disease phenotypes
Source: PubMed Central journal article supplement — Cold Spring Harb Mol Case Stud. 2018 Aug;4(4):a002733. doi: 10.1101/mcs.a002733 (PMC6071568; doi:10.1101/mcs.a002733), 2018-08
Supplement: supp_mcs.a002733_Supplemental_Figure_1.pdf [file supp_mcs.a002733_Supplemental_Figure_1.pdf]

**A** c.4253+43G>A

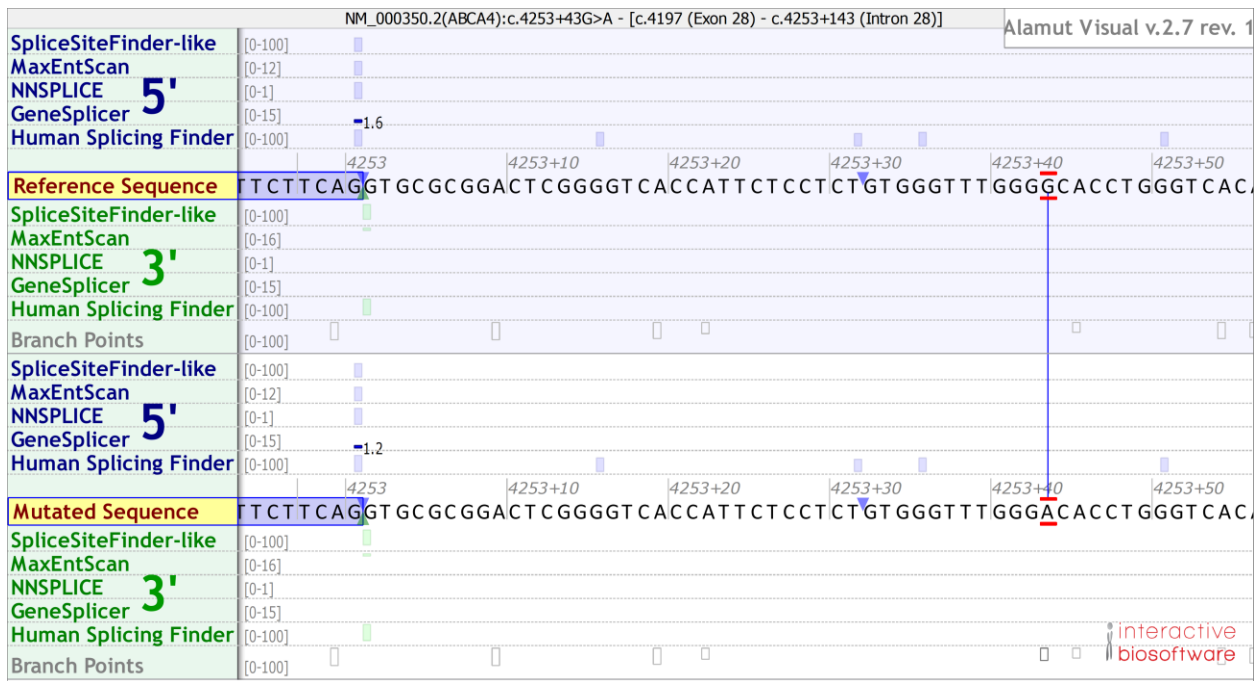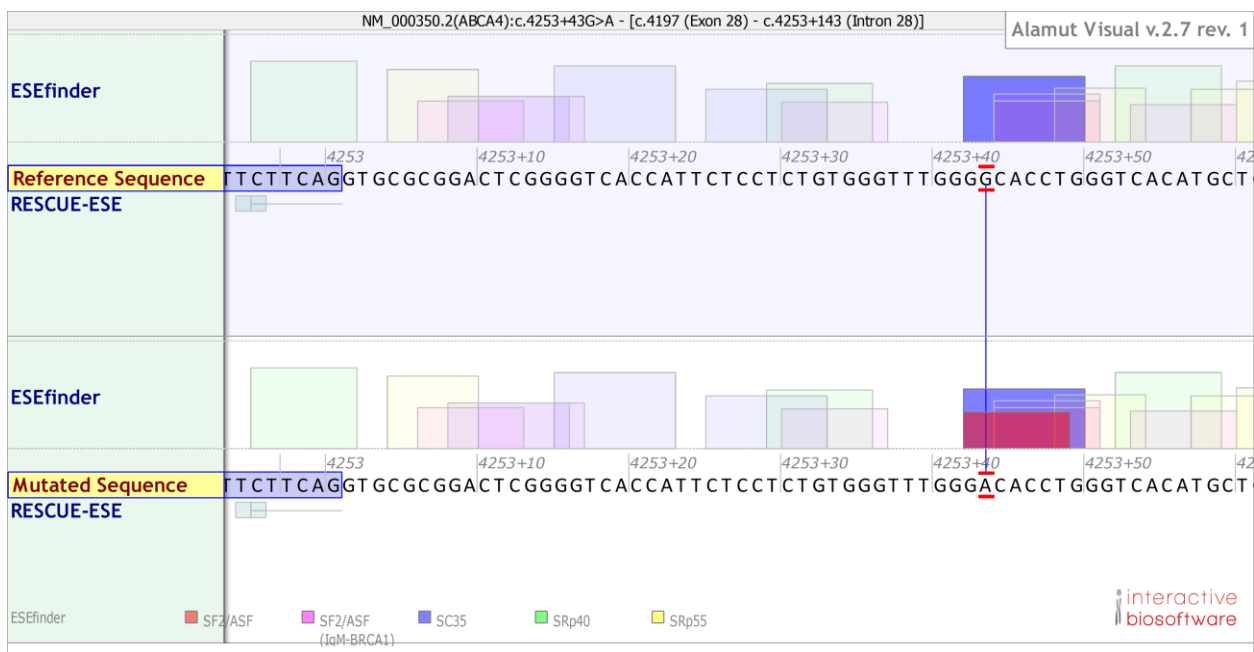

Changes: SC35 motif 3.75>3.39, and new SF2/ASF motif 2.09

| Predicted signal | Prediction algorithm        | cDNA Position                                                                                                           | Interpretation                                                         |
|------------------|-----------------------------|-------------------------------------------------------------------------------------------------------------------------|------------------------------------------------------------------------|
| ESS Site broken  | 1 - Sironi et al. - Motif 2 | <pre> g g t t c g g g a c a c c  -----   -----   -----  38 38 40 42 44 46                     </pre>                    | Alteration of an intronic ESS site.<br>Probably no impact on splicing. |
|                  | 2 - Fas-ESS hexamers        |                                                                                                                         |                                                                        |
| New ESE Site     | 1 - HSF Matrices - 9G8      | <pre> g t t t g g g g c a c c t g g g c c  -----   -----   -----  38 38 40 42 44 46 48 50 52                     </pre> | Creation of an intronic ESE site.<br>Probably no impact on splicing.   |
|                  | 2 - EIEs from Zhang et al.  |                                                                                                                         |                                                                        |
|                  | 3 - ESE-Finder - SF2/ASF    |                                                                                                                         |                                                                        |

**B** c.6006-609T>A

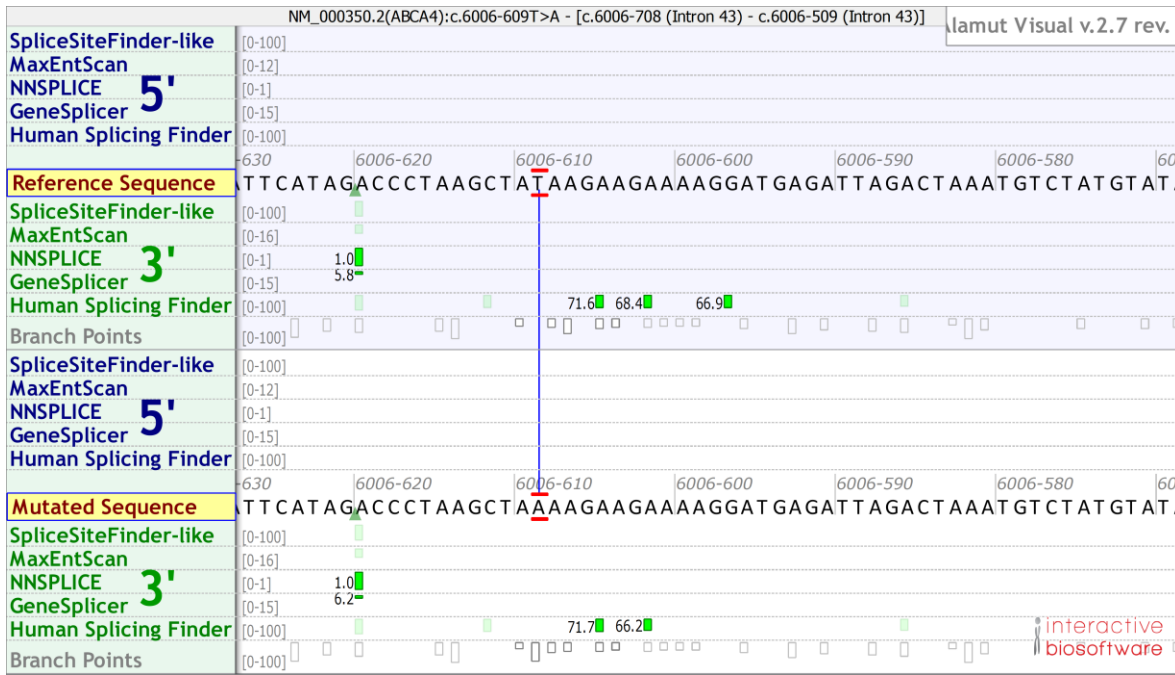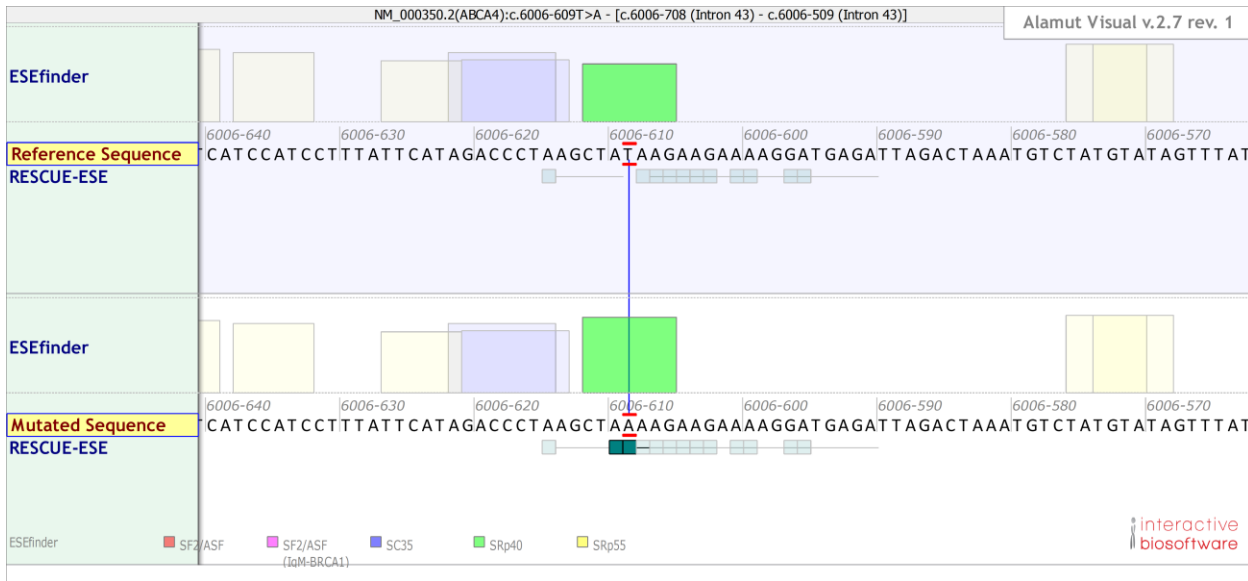

Changes: SRp40 motif 2.71>3.53

| Predicted signal | Prediction algorithm                | cDNA Position | Interpretation                                                               |
|------------------|-------------------------------------|---------------|------------------------------------------------------------------------------|
| New ESE Site     | 1 - EIEs from Zhang et al.          |               | <p>Creation of an intronic ESE site.<br/>Probably no impact on splicing.</p> |
|                  | 2 - HSF Matrices - Tra2-β           |               |                                                                              |
|                  | 3 - RESCUE ESE Hexamers             |               |                                                                              |
|                  | 4 - ESR Sequences from Goren et al. |               |                                                                              |

**C** c.5196+1056A>G

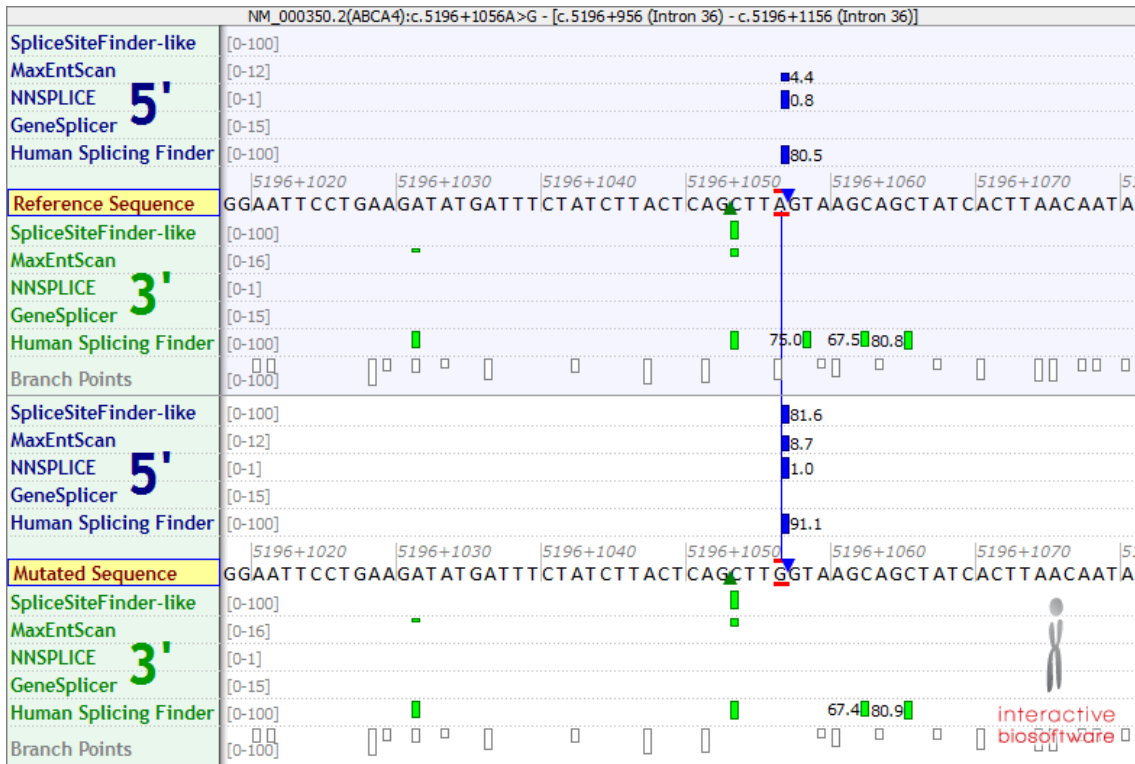

Cryptic donor strongly activated

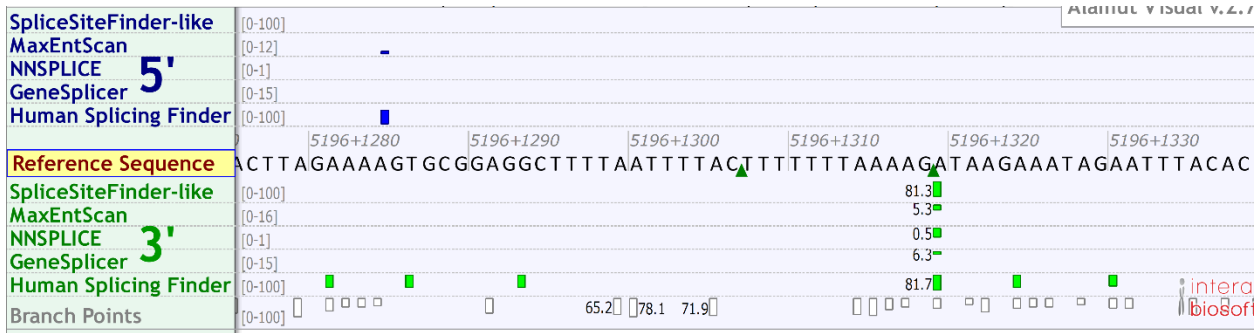

Probable nearest downstream cryptic splice acceptor at c.5196+1318

Splicing from these cryptic sites would result in a 262 bp pseudoexon and frameshift.

| Predicted signal | Prediction algorithm | cDNA Position                                                                                                | Interpretation                                                                             |
|------------------|----------------------|--------------------------------------------------------------------------------------------------------------|--------------------------------------------------------------------------------------------|
| New Donor Site   | 1 - HSF Matrices     | <p>Sequence: a g c c t t g g t a a g c a g c</p> <p>Positions: 1,052 1,054 1,056 1,058 1,060 1,062 1,064</p> | <p>Activation of an intronic cryptic donor site.<br/>Potential alteration of splicing.</p> |
|                  | 2 - MaxEnt           |                                                                                                              |                                                                                            |

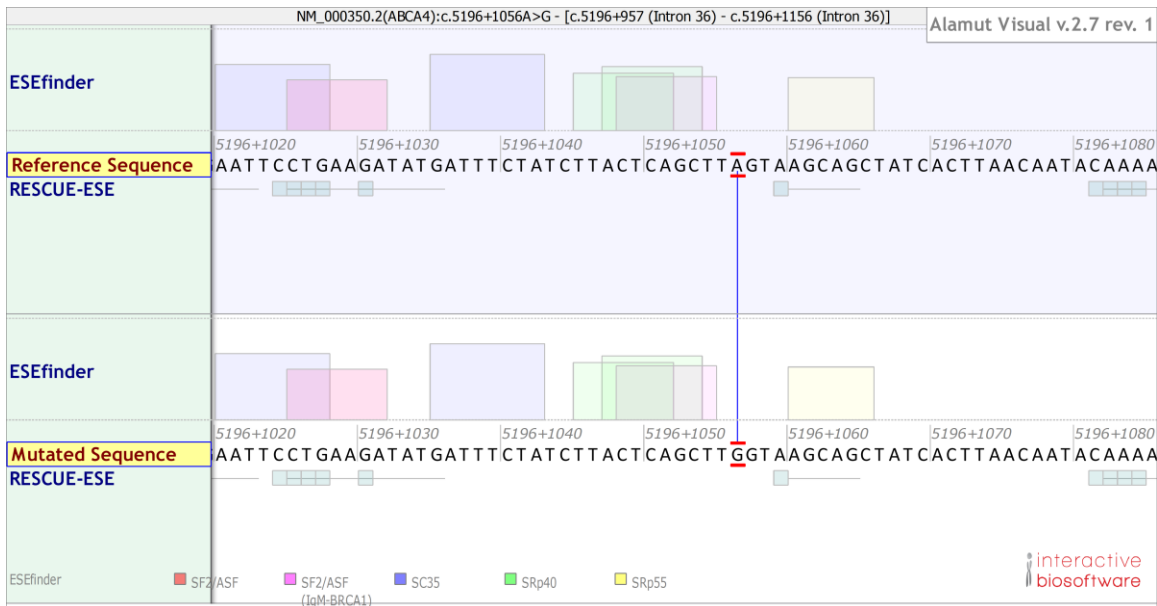

**Supplemental Figure 1. Predicted effects of the three non-coding *ABCA4* variants on splicing and exonic splicing enhancers and silencers (ESE and ESS).** Assessed using 5 different algorithms (SpliceSiteFinder, MaxEntScan, NNSPLICE, GeneSplicer, Human Splicing Finder) via Alamut software (<http://www.interactive-biosoftware.com>).
