# Supplementary figures and images for: Extremely hypomorphic and severe deep intronic variants in the ABCA4 locus result in varying Stargardt disease phenotypes
Source: PubMed Central journal article supplement — Cold Spring Harb Mol Case Stud. 2018 Aug;4(4):a002733. doi: 10.1101/mcs.a002733 (PMC6071568; doi:10.1101/mcs.a002733), 2018-08

## Clinical Presentation and Onset

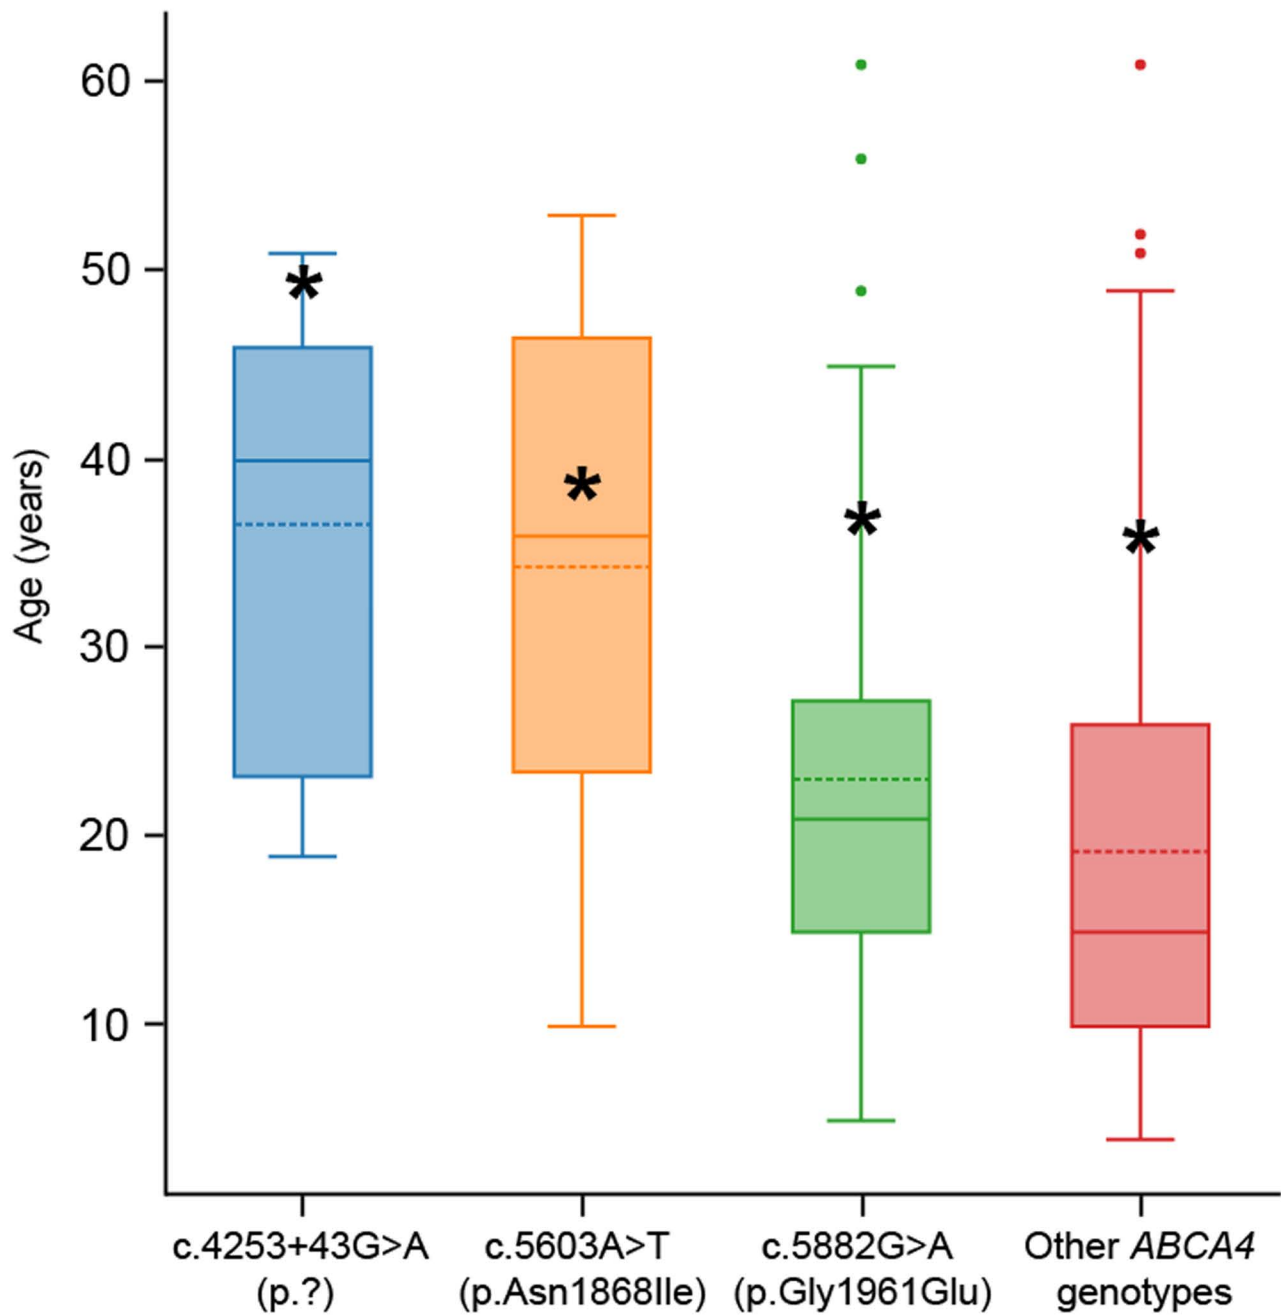

Supplement: supp_mcs.a002733_Supplemental_Figure_2.pdf [file supp_mcs.a002733_Supplemental_Figure_2.pdf]
